# Supplementary material for: C1 inhibitor in canine intravascular hemolysis (C1INCH): study protocol for a randomized controlled trial
Source: PubMed Central journal article supplement (PMC6937664; doi:10.1186/s12917-019-2220-2), 2019-12-30
Supplement: 12917_2019_2220_MOESM1_ESM.pdf [file 12917_2019_2220_MOESM1_ESM.pdf]

APPLY CASE STICKER HERE

## C1-INCH Trial

- Consent form signed
- Notify trial coordinators
- Notify Dr. Goggs

### INCLUSION CRITERIA

Primary intravascular IMHA

- Anemia (<30%) AND  $\geq 1$  of:
  - Positive in-saline agglutination test
  - Positive Coombs' test (if not agglutinating)
  - Moderate to marked spherocytosis
- Evidence of intravascular hemolysis  
Hemoglobinemia or hemoglobinuria

### EXCLUSION CRITERIA

- <4kg OR >28kg
- 6 months old OR >10 years old
- Platelet count <30,000 cells /  $\mu\text{L}$
- Underlying associated disease process  
e.g. Infectious disease, neoplasia, etc.
- Prior corticosteroids for  $\geq 72\text{h}$
- Prior immunosuppressives e.g. MMF, aza, cyclo

### RECORD BASELINE (DAY 1) DATA

|                  |       |                                                            |       |
|------------------|-------|------------------------------------------------------------|-------|
| Age              | _____ | <input type="checkbox"/> MGCS                              | _____ |
| Bodyweight       | _____ | <input type="checkbox"/> SpO <sub>2</sub>                  | _____ |
| Temperature      | _____ | <input type="checkbox"/> Fluid score                       | _____ |
| Heart rate       | _____ | <input type="checkbox"/> Blood lactate                     | _____ |
| Respiratory rate | _____ | <input type="checkbox"/> Blood glucose                     | _____ |
| Mentation score  | _____ | <input type="checkbox"/> SAP _____ / DAP _____ / MAP _____ |       |

### COLLECT BASELINE STUDY SAMPLES

- Serum: 2x red-top: Separate serum, submit 1 for chemistry, split second into 2 and freeze at -20°C
- EDTA: 2x lilac top: Submit 1 for CBC, submit 1 for erythrocyte bound C3b estimation`
- Citrate: 1x blue top: Separate plasma, freeze at -20°C
- Heparin: 1x green top: Separate plasma, freeze at -20°C

### COMPLETE STANDARDIZED DIAGNOSTIC EVALUATION

- Complete blood count
- Serum chemistry
- Urinalysis
- Tick-borne disease serology or PCR testing
- In-saline agglutination OR Coombs' test
- 3-view thoracic radiographs
- Abdominal ultrasound

### RANDOMIZE

- Login to site: <https://www.sealedenvelope.com/simple-randomiser/v1/trials/c1inch>
- Enter data, enter password, confirm inclusion/exclusions, enter location, then randomize

- Record randomization code here: \_\_\_\_\_ If Pharmacy open, show code to Pharmacist   
 OOH: LVT to select corresponding package from Cubex, open, follow instructions. **DO NOT DISCLOSE TX TO DVM**
- 

### DAY 2

- Serum: 2x red-top: Separate serum, submit 1 for chemistry, split second into 2 and freeze at -20°C  
 EDTA: 2x lilac top: Submit 1 for CBC, submit 1 for erythrocyte bound C3b estimation`  
 Citrate: 1x blue top: Separate plasma, freeze at -20°C  
 Heparin: 1x green top: Separate plasma, freeze at -20°C

### DAY 3

- Serum: 2x red-top: Separate serum, submit 1 for chemistry, split second into 2 and freeze at -20°C  
 EDTA: 2x lilac top: Submit 1 for CBC, submit 1 for erythrocyte bound C3b estimation`  
 Citrate: 1x blue top: Separate plasma, freeze at -20°C  
 Heparin: 1x green top: Separate plasma, freeze at -20°C

### DAY 4

- Serum: 2x red-top: Separate serum, submit 1 for chemistry, split second into 2 and freeze at -20°C  
 EDTA: 2x lilac top: Submit 1 for CBC, submit 1 for erythrocyte bound C3b estimation`  
 Citrate: 1x blue top: Separate plasma, freeze at -20°C  
 Heparin: 1x green top: Separate plasma, freeze at -20°C

### DAY 5

- Serum: 2x red-top: Separate serum, submit 1 for chemistry, split second into 2 and freeze at -20°C  
 EDTA: 2x lilac top: Submit 1 for CBC, submit 1 for erythrocyte bound C3b estimation`  
 Citrate: 1x blue top: Separate plasma, freeze at -20°C  
 Heparin: 1x green top: Separate plasma, freeze at -20°C
- 

### FOLLOW-UP - DAY 7

- IF DISCHARGED... Call client  
 Determine and record patient status (Alive, Died, Euthanized) \_\_\_\_\_  
 Adverse events (Y/N) \_\_\_\_\_. Detail separately if yes.
- 

### FOLLOW-UP - DAY 14

- IF DISCHARGED... Call client  
 Determine and record patient status (Alive, Died, Euthanized) \_\_\_\_\_  
 Adverse events (Y/N) \_\_\_\_\_. Detail separately if yes.
- 

### FOLLOW-UP - DAY 28

- IF DISCHARGED... Call client  
 Determine and record patient status (Alive, Died, Euthanized) \_\_\_\_\_  
 Adverse events (Y/N) \_\_\_\_\_. Detail separately if yes.
